# Supplementary material
Source: publisher figshare collection journal article supplement (https://acs.figshare.com/ndownloader/files/4165486)
Supplement: Supplementary file 1 [file 4165486]

# Supporting information-----

## Quantification of Proteins by Functionalized Gold Nanoparticles Using Click Chemistry

Kui Zhu,<sup>a, b</sup> Yi Zhang,<sup>a</sup> Sha He,<sup>a</sup> Wenwen Chen,<sup>a</sup> Zhuo Wang, \*<sup>a</sup> Jianzhong Shen\*<sup>b</sup>  
and Xingyu Jiang\*<sup>a</sup>

<sup>a</sup> Key Lab for Biological Effects of Nanomaterials and Nanosafety,  
National Center for NanoScience and Technology, Chinese Academy  
of Sciences, Beijing 100190, China.

Tel: +86 010 8254 5558; Fax: +86 010 8254 5631;

E-mail: xingyujiang@nanoctr.cn, wangz@nanoctr.cn

<sup>b</sup> Department of Pharmacology and Toxicology, College of Veterinary  
Medicine, China Agricultural University, Beijing 100193, China.

Tel: +86 10 6273 2803; Fax: +86 10 6273 1032;

E-mail: sjz@cau.edu.cn

19  
  
20  
  
21  
  
22  
  
23  
  
24  
  
25  
  
26  
  
27  
  
28  
  
29  
  
30  
  
31  
  
32  
  
33  
  
34  
  
35  
  
36  
  
37

**Content list**

Experimental section-----3

Figure S1-----5

Figure S2 -----6

Figure S3 -----7

Table S1 -----8-9

Table S2 -----10

Table S3 -----11

Table S4 -----12

Table S5 -----13

Table S6 -----14

References -----15

## Experimental section

Bathocuproine disulfonic acid and bovine serum protein were purchased from Sigma Chemical Co. (St. Louis, Mo, USA). Casein, and Bradford kit were purchased from Solarbio Science and Technology Co., LTD (Beijing, China). BCA kit was purchased from Tiangen BIOTECH Co., LTD (Beijing, China). The sera of bovine, canine, duck, equine, feline and rabbit were kindly provided by Prof. Xin Guo (China Agricultural University). All the other used chemical reagents were analytical grade from Beijing Chemical Works. Milk samples were purchased from local supermarket in Beijing.

We prepared AuNPs, azide- and alkyne-functionalized AuNPs according previous work using thiol exchange reactions.<sup>1,2</sup> The prevention of protein adsorption on functionalized AuNPs was desired with a mole ration of PEG/ azide/ alkyne (5/1/1). The azide- and alkyne-functionalized AuNPs were mixed equally to obtain a fresh homogenous dispersed solution before use.

The Biuret reagent consist of potassium hydroxide and hydrated copper (II) sulfate, together with potassium sodium tartrate.<sup>3</sup> We first mixed proteins with Biuret reagents for five minutes at room temperature and then added appropriated functionalized AuNPs before test. All the experiments were repeated at least three times to ensure the accuracy of the measurement.

60 Statistical analysis: Normalized absorbance represents the ratio of  
61 various absorbance versus the maximum absorbance (5 mg/mL protein),  
62 respectively, in calibration curves of Bradford, BCA assay and CAP. A  
63 four parameter-logistic equation was used to fit the data. Calculations  
64 were performed using OriginPro 7.5 software (OriginLab Corporation,  
65 Northampton, MA).

66

67

68

69

70

71

72

73

74

75

76

77

78

79

80

81

## 82 Figures and Tables

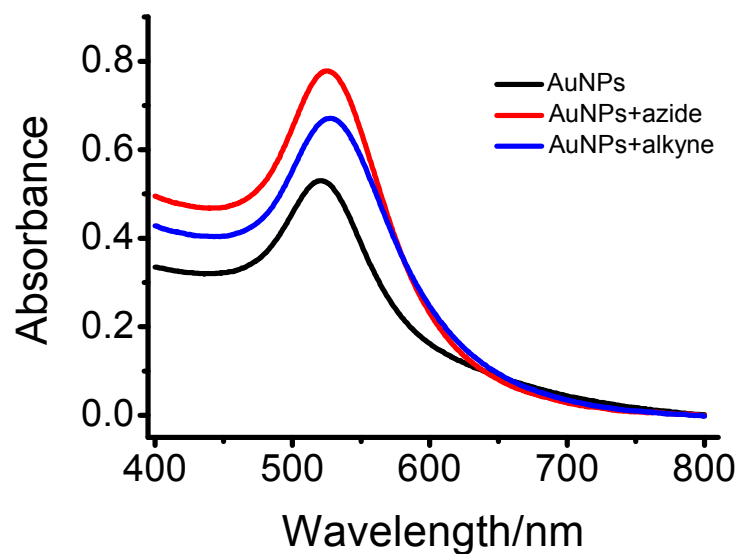

83

84 Figure S1 UV-vis spectra of the functionalized and undecorated AuNPs.

85 Note: The molecules on functionalized AuNPs are listed as below:

86 (1) thiol-PEG:

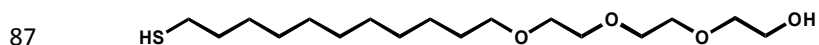

88 (2) azide functional ligands:

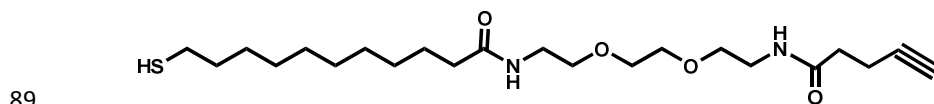

90 (3) alkyne functional ligands:

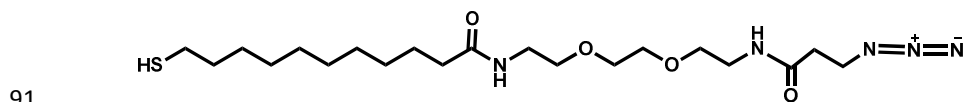

92

93

94

95

|         | A | B | C | D | E | F |
|---------|---|---|---|---|---|---|
| AuNPs   | ✓ | ✓ | ✓ | ✓ | ✓ | ✓ |
| BCDSA   |   | ✓ |   |   |   | ✓ |
| Protein |   |   | ✓ |   | ✓ | ✓ |
| Cu (II) |   |   |   | ✓ | ✓ | ✓ |

95

96 Figure S2 Typical photograph (A to F) shows the specificity of CAP for  
 97 the determination of proteins at room temperature, and the various  
 98 compounds are listed in the following table. The reagents added to each  
 99 bottle are indicated below the image, and equal volume of alkaline  
 100 solution was added to each bottle.

101

102

103

104

105

106

107

108

109

110

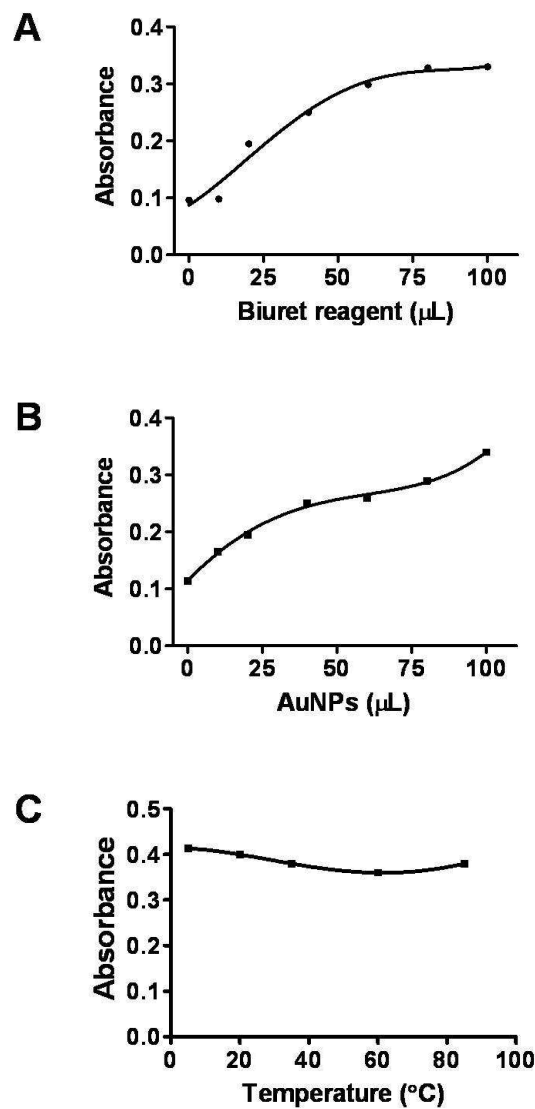

Figure S3 Optimal conditions of the CAP. (A) Effect of Biuret reagent; (B) Effect of the mixture of the functionalized AuNPs; (C) Effect of temperature of CAP.

121

122

|                 | <b>Pep</b> | <b>OVA</b> | <b>HSA</b> | <b>BSA</b> | <b>SPA</b> | <b>Hb</b> | <b>IgG</b> | <b>TRY</b> | <b>LYZ</b> | <b>SD</b> |
|-----------------|------------|------------|------------|------------|------------|-----------|------------|------------|------------|-----------|
| <b>pI</b>       | 1.0        | 4.6        | 4.7        | 4.7        | 5.1        | 7.1       | 8.0        | 10.3       | 11.0       | —         |
| <b>Mw (kDa)</b> | 35.0       | 43.0       | 68.5       | 68.5       | 45.0       | 64.5      | 149.9      | 23.3       | 14.6       | —         |
| <b>BCA</b>      | 0.544      | 1.276      | 1.002      | 1.000      | 0.942      | 0.839     | 0.782      | 0.487      | 1.475      | 0.302     |
| <b>Bradford</b> | 0.030      | 0.999      | 1.015      | 1.000      | 0.677      | 1.019     | 0.272      | 0.255      | 0.912      | 0.342     |
| <b>CAP</b>      | 0.624      | 1.312      | 1.008      | 1.000      | 0.911      | 0.853     | 0.713      | 0.507      | 1.421      | 0.301     |

123 Table S1 CAP for various purified proteins.

124 Note: The values of BCA, Bradford and CAP are the ratios of the OD

125 values of various proteins and OD value of the standard (1 mg/mL BSA).

126 Pep: pepsin; OVA: ovalbumin; HSA: human serum albumin; BSA:

127 bovine serum albumin; SPA: staphylococcal protein A; Hb: hemoglobin;

128 IgG: immunoglobulin G; TRY: trypsin; LYZ: lysozyme; SD: standard

129 deviation. SDs are calculated row-wise, which evaluate the robustness of

130 the three assays.

131

132 Herein, we give more elaborate details and add experiments to illustrate the

133 discrepancy of the three assays in Table S1. First, according to the mechanism of CAP,

134 Cu (II) is reduced to Cu (I) by proteins in the alkaline solution, which is similar to

135 BCA. While Bradford assay is based on the dye-protein interactions. The discrepancy

136 of the three assays is mainly due to the intrinsic properties of the protein individuals,

137 such as the amino acid composition of the protein, glycosylated modification and the



138 stereo structures of the proteins of interest.<sup>4-7</sup> Of the amino acids normally found in  
139 proteins, the BCA reagents only reacts with cysteine, cystine, tyrosine and  
140 tryptophan.<sup>8</sup> For Bradford assay, the Coomassie dye binds to proteins with arginine  
141 residues on the basis of hydrophobic and ionic interactions.<sup>5</sup> Many types of  
142 carbohydrates hinder the binding of the dyes to hydrophobic and basic residues, and  
143 the hydrophilic sugar moieties can change the hydrophobicity of the glycoproteins so  
144 that less dye binds with proteins.<sup>7</sup> Because asparagine residues which are usually  
145 involved in carbohydrate linkage, are not involved with the dye binding while it  
146 prefers to arginine residues.<sup>5</sup>  
147 Furthermore, the discrepancy in the values determined by the colorimetric assays may  
148 be partially due to the used standard protein (such as BSA) which may respond  
149 differently to the specific reagents which are used in different assays. The choice of  
150 standard protein is critical to the success of the assay. BSA is the original standard of  
151 choice, however, it has been noted that BSA has a significantly higher than “normal”  
152 response.<sup>9</sup> The BSA standard curve can only therefore be used to compare the relative  
153 protein concentration of similar protein solutions. As a result, there is a better  
154 agreement in the estimation of HSA and BSA in Table S1, for the two proteins sharing  
155 the conservative structure. So we applied BCA, Bradford and CAP methods to assay  
156 different proteins with different molecular weights and isoelectric points. Our choice  
157 of proteins is not arbitrary: these proteins represent a wide range of pIs (from 1.0 to  
158 11.0). Moreover, OVA, HSA, BSA, Hb and IgM were widely used to investigate the  
159 discrepancy among Bradford, BCA and Lowry assays.<sup>7</sup> And we added several  
160 commonly used proteins to extend the pI range from 1.0 to 11.0. Smith *et al* used seven  
161 proteins to illustrate the protein-protein variation for the BCA method compared to the  
162 other method.<sup>10</sup> These proteins also represent a wide range of species from which they  
163 originate: bacteria, birds and mammals.

164  
165  
166  
167

168

169

| Interferents | Ratio of ODs | Interferents   | Ratio of ODs | Interferents                                        | Ratio of ODs |
|--------------|--------------|----------------|--------------|-----------------------------------------------------|--------------|
| 10% SDS      | 1.016        | 10mg/mL Lys    | 1.009        | 3M Urea                                             | 1.036        |
| 1% CTAB      | 7.089        | 10mg/mL Tyr    | 1.018        | 4M NH <sub>2</sub> OH·HCl                           | 0.920        |
| 1% Triton    | 1.170        | 1% Citric acid | 1.046        | 0.5M Tris-base                                      | 0.795        |
| 1% Tween     | 1.027        | 10mg/mL DTE    | 0.705        | 1% Methanol                                         | 1.045        |
| 10% Lecithin | 8.560        | 10mg/mL DTT    | 0.705        | 2M Na <sub>2</sub> Ac                               | 1.045        |
| 10mg/mL Thr  | 0.920        | 10mM Glucose   | 0.938        | 0.3% Melamine                                       | 0.714        |
| 10mg/mL Gly  | 0.839        | 40% Sucrose    | 0.991        | 20% (NH <sub>4</sub> ) <sub>2</sub> SO <sub>4</sub> | 0.821        |
| 10mg/mL Ser  | 0.964        | 100mM EDTA     | 1.063        | 1M NaCl                                             | 1.071        |

170 Table S2 Effect of various laboratory reagents on CAP.

171 Note: ratio of ODs: ratios of the OD values of interferences and OD value  
172 of the standard (1 mg/mL BSA). SDS: sodium dodecyl sulfate; CTAB:  
173 cetyl trimethylammonium bromide; Thr: Threonine; Gly: Glycine; Ser:  
174 Serine; Lys: Lysine; Tyr: Tyrosine; DTT: dithiothreitol; DTE:  
175 dithioerythritol; EDTA: ethylenediaminetetraacetic acid; NH<sub>2</sub>OH·HCl:  
176 hydroxylamine hydrochloride; Na<sub>2</sub>Ac: sodium acetate; (NH<sub>4</sub>)<sub>2</sub>SO<sub>4</sub>:  
177 ammonium sulfate; NaCl: sodium chloride. If the OD value around 1, it is  
178 considered normal data. Larger or small values indicate strong  
179 interference.

180

181

|          | Bovine | Canine | Anatine | Equine | Feline | Leporine (mg/mL) |
|----------|--------|--------|---------|--------|--------|------------------|
| BCA      | 73     | 55     | 26      | 68     | 75     | 64               |
| Bradford | 68     | 57     | 23      | 71     | 66     | 59               |
| CAP      | 69     | 52     | 27      | 65     | 70     | 68               |

182 Table S3 Comparison of the three methods for the determination of  
183 protein concentrations in various sera.

184 Note: Least Significant Difference (LSD) test was introduced to analyze  
185 the results.

186

187

188

189

190

191

192

193

194

195

196

| Samples                             | Fresh milk (mg /100 mL) |     |     |     |     |     |     |
|-------------------------------------|-------------------------|-----|-----|-----|-----|-----|-----|
|                                     | 1                       | 2   | 3   | 4   | 5   | 6   | 7   |
| BCA <sup>a</sup>                    | 3.1                     | 3.1 | 3.3 | 3.5 | 3.4 | 3.4 | 3.1 |
| CAP <sup>b</sup>                    | 2.0                     | 2.2 | 2.7 | 2.1 | 2.6 | 3.0 | 2.8 |
| Claimed on the package <sup>a</sup> | 2.9                     | 2.9 | 3.2 | 3.0 | 3.1 | 3.4 | 2.9 |

197 Table S4 Comparison of the two methods in the determination of  
 198 proteins in fresh milk samples.

199

200

201

202

203

204

205

206

207

208

209

210

| Samples                   | Yogurt (mg /100 mL) |     |     |     |     |
|---------------------------|---------------------|-----|-----|-----|-----|
|                           | 1                   | 2   | 3   | 4   | 5   |
| BCA                       | 2.0                 | 2.0 | 2.1 | 1.8 | 2.5 |
| CAP                       | 2.8                 | 2.6 | 3.6 | 2.7 | 2.4 |
| Claimed on<br>the package | 3.0                 | 2.9 | 3.0 | 1.0 | 3.2 |

211 Table S5 Comparison of the two methods in the determination of proteins  
212 in yogurt samples.

213

214

215

216

217

218

219

220

221

222

223

224

| Samples                | Skim milk (mg /100 mL) |     |     |
|------------------------|------------------------|-----|-----|
|                        | 1                      | 2   | 3   |
| BCA                    | 2.3                    | 3.0 | 2.4 |
| CAP                    | 5.1                    | 3.3 | 2.9 |
| Claimed on the package | 5.7                    | 3.3 | 2.9 |

225 Table S6 Comparison of the two methods in the determination of proteins

226 in skim milk samples.

227

228

229

230

231

232

233

234

235

236

237

239 

## References

- 240 1 Qu, W. S.; Liu, Y. Y.; Liu, D. B.; Wang, Z.; Jiang, X.Y. *Angew. Chem.*  
241 *Int. Ed.* **2011**, *50*, 3442-3445.
- 242 2 Zhou, Y.; Wang, S.X.; Zhang, K.; Jiang, X.Y. *Angew. Chem. Int. Ed.*  
243 **2008**, *47*, 7454-7456.
- 244 3 Gornall, A. G.; Bardawill, C. J.; David, M. M. *J. Biol. Chem.*, **1949**,  
245 *177*, 751-766.
- 246 4 Olson, B. J.S.C.; Markwell, J. *Current Protocols in Protein Science*,  
247 **2007**, 3.4.1-3.4.29.
- 248 5 Compton, S.J.; Jones, C.G. *Anal. Biochem.*, **1985**, *151*, 369-374.
- 249 6 Walker, J. M. *The Protein Protocols Handbook (2nd)*, **1996**, p11-14.
- 250 7 Fountoulakis, M.; Juranville, J.F.; Manneberg, M. *J. Biochem. Biophys.*  
251 *Meth.*, **1992**, *24*, 265-274.
- 252 8 Wiechelman, K. J.; Braun, R. D.; Fitzpatrick, J. D. *Anal. Biochem.*,  
253 **1988**, *175*, 231-237.
- 254 9 Stoscheck, C.M. *Meth. Enzymol.* **1990**, *182*, 50-68.
- 255 10 Smith, P. K.; Krohn, R. I.; Hermanson, G. T.; Mallia, A. K.; Gartner,  
256 F. H.; Provenzano, M. D.; Fujimoto, E. K.; Goeke, N. M.; Olson, B.  
257 J.; Klenk, D. C. *Anal. Biochem.*, **1985**, *150*, 76-85.
